# Supplementary material for: Identification of a positive-Seebeck-coefficient exohedral fullerene
Source: Royal Society of Chemistry journal article supplement (doi:10.1039/c6nr02291j), 2016-01-01
Supplement: c6nr02291j1.pdf [file c6nr02291j1.pdf]

## Supporting Information

# Identification of a positive-Seebeck-coefficient exohedral fullerene

Nasser Almutlaq<sup>‡a,c</sup>, Qusiy Al-Galiby<sup>‡a,b,d</sup>, Steven Bailey<sup>‡a,b</sup> and Colin Lambert<sup>\*‡a,b</sup>

<sup>a</sup>Department of physics, Lancaster University, Lancaster LA1 4YB, UK.

<sup>b</sup>Quantum Technology Center, Physics Department, Lancaster University, Lancaster LA1 4YB, United Kingdom.

<sup>c</sup>Department of Physics, Northern Border University, Saudi Arabia.

<sup>d</sup>Department of Physics, College of Education, Al Qadisiyah University, Al Qadisiyah, IRAQ.

<sup>‡</sup> Authors contributed equally.

\*Corresponding author: c.lambert@lancaster.ac.uk, qusiyaalgaliby@gmail.com

Table S1. DFT calculation of the charge transferred between the chlorine atoms and fullerene C<sub>50</sub>.

|                  | Neutral | With Cl | $\Delta N$ |
|------------------|---------|---------|------------|
| C <sub>50</sub>  | 200     | 198.67  | +1.32      |
| Cl <sub>10</sub> | 70      | 71.318  | -1.318     |

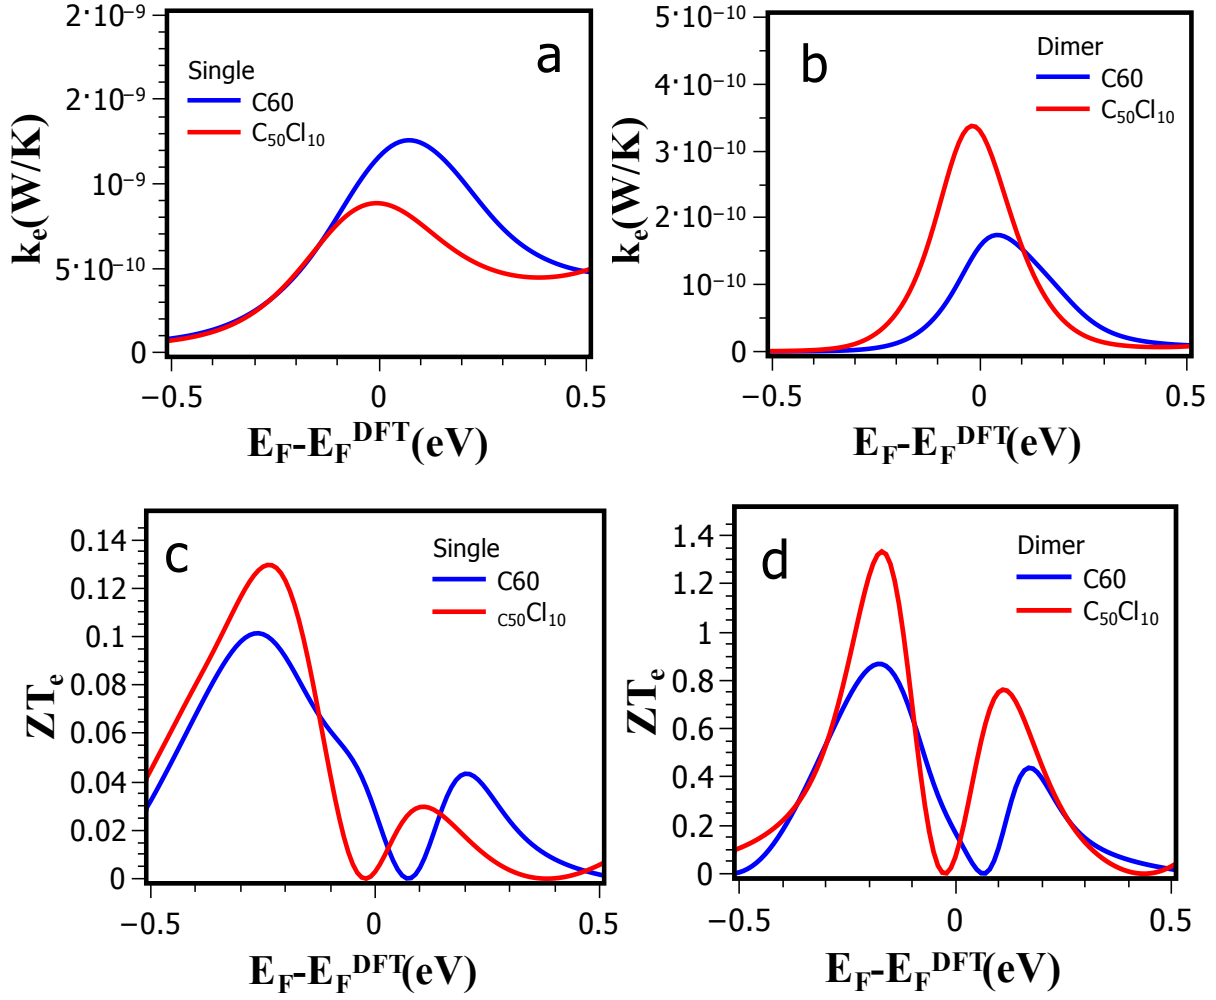

**Figure S1.** The upper panel, Figures (a and b) shows a comparison of room-temperature electronic thermal conductance ( $k_e$ ) and the lower panel, Figures (c and d) show electronic figure of merit ( $ZT_e$ ) over a range of Fermi energies  $E_F$  relative to the DFT-predicted Fermi energy  $E_F^{DFT}$  between for the systems in Figures 3 and 4.

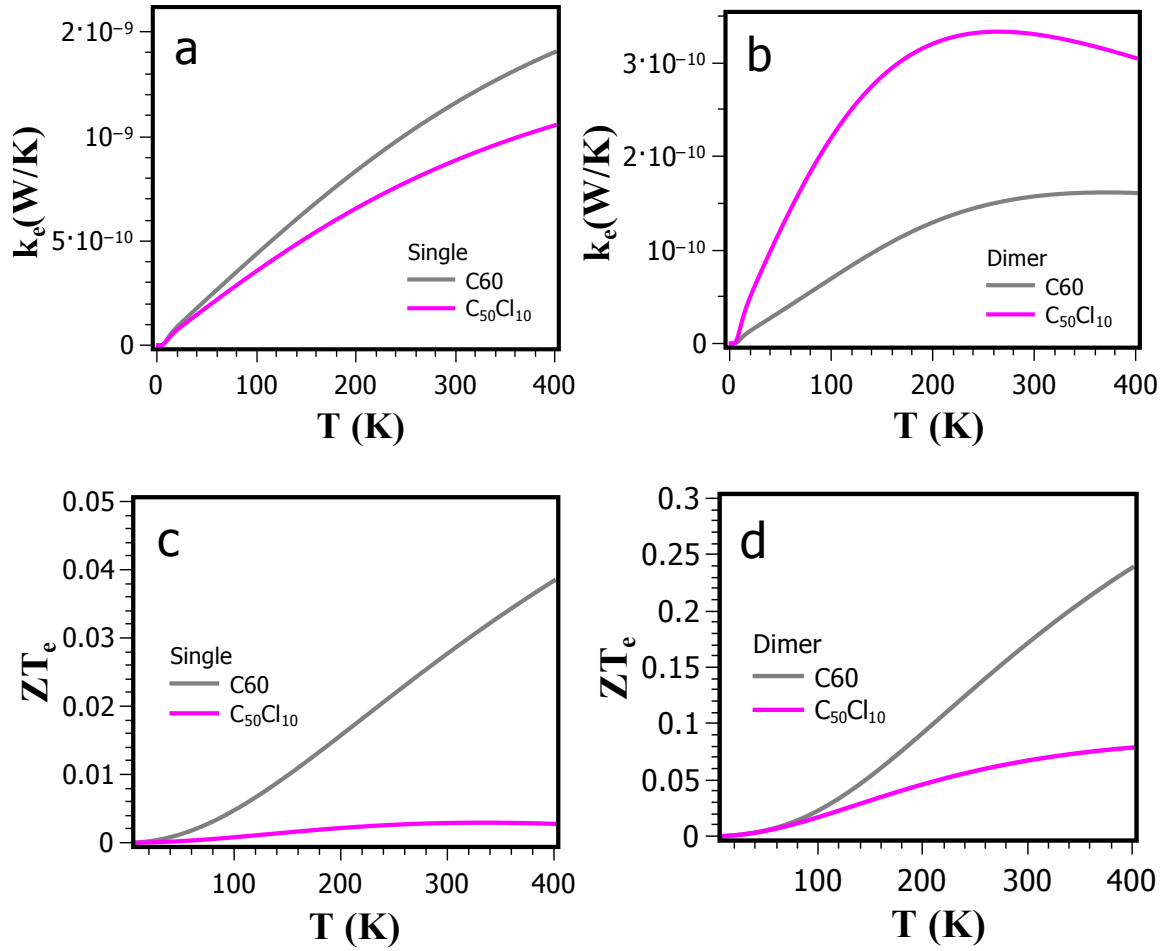

**Figure S2.** The left column, (a and c) shows a comparison of electronic thermal conductance ( $k_e$ ) and electronic figure of merit ( $ZT_e$ ) as a function of temperature at DFT-predicted Fermi energy  $E_F^{DFT}$  between the systems in Figures 3a and 4a. The upper panels (a and b) show the comparison of electronic thermal conductance ( $k_e$ ) the lower panels (c and d) show electronic figure of merit ( $ZT_e$ ) for the systems in Figures 3b and 4b.

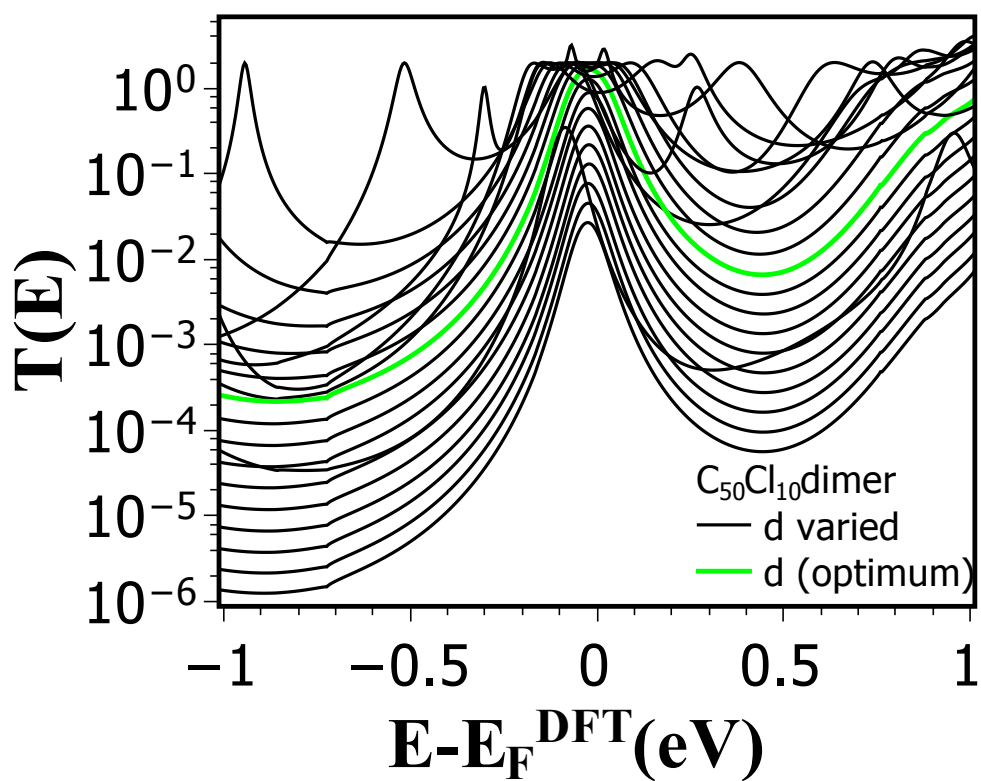

**Figure S3.** Shows the set of transmission coefficients as a function of energy for  $C_{50}Cl_{10}$  dimers, where the black lines show  $T(E)$  for various distances  $d$ , ranging from 1.2 Å to 5 Å. The the green line shows  $T(E)$  at the optimum distance.
